# Supplementary material for: Improving skills and care standards in the support workforce for older people: a realist synthesis of workforce development interventions
Source: PubMed Central journal article supplement (PMC5013423; doi:10.1136/bmjopen-2016-011964), 2016-08-25
Supplement: bmjopen-2016-011964supp2.pdf [file bmjopen-2016-011964supp2.pdf]

**BACKGROUND SEARCH/FOR FUNDING BID**

1

**PRIMARY SEARCH**

Search run on 11/05/2015-14/05/2014  
 Alerts scanned until April 2015  
 Databases searched: PsycInfo via ProQuest 1806-current (1753), HTA (8), ProQuest Social Science Abstracts 1979-current and ProQuest Sociological Abstracts 1952-current (1662), Medline via EBSCO 1946-current (8722), NHS EED 1994-2014 (86), Web of Science 1900-current (714), Cinahl via EBSCO 1996-current (3030), Cochrane 1996-current (16), ASSIA via ProQuest 1987-current (991), CRD DARE 1994-2014 (51)

Total results 17,033  
 After de-duplication 12,349  
 After first title sift 1,011  
 After second title sift 132  
 After abstract sift 61  
 After full text sift 28  
 +  
 Databases searched via NHS Athens: AMED (45), HMIC (39)  
 After deduplication 47  
 After title sift 9  
 After abstract sift 6  
 After full text sift 6  
 + Papers from alerts = 2

36

**PURPOSIVE SEARCHES**

**“CAREER SEARCH”**  
 Search run on 06/11/2014  
 Databases searched: Medline (862), Cinahl (555), PsycInfo (677), ProQuest Social Science Abstracts and Sociological Abstracts and ASSIA (597)  
 Total results 2691  
 After de-duplication 2063  
 After title sift 28  
 After abstract sift 7  
 After full text sift 1

1

**“PRACTICE DEVELOPMENT AND PERSON CENTRED SEARCH”**  
 Search run on 25/11/2014  
 Databases searched: *International Journal of Older People’s Nursing purposive search (Practice development issues)*  
*Dates searched: 2006-2012*  
*Volumes: 28*  
*International Practice Development Journal purposive search 25/11/14*  
*Dates: 2011-2014*  
*Volumes checked: 9*

11

**“SETTINGS SEARCH”**  
 Search run on 18/12/2014  
 Databases searched: Medline (1446), Cinahl (450), PsycInfo, ProQuest Social Science Abstracts and Sociological Abstracts and ASSIA (899)  
 Total Results 2544  
 After de-duplication 1957  
 After title sift 23  
 After abstract sift 4  
 After full text sift 1

1

**“SKILLS SEARCH”**  
 Search run on 07/11/2014  
 Databases searched: Medline (2943), CINAHL (1680), Psycinfo, ProQuest Social Science Abstracts and Sociological Abstracts and ASSIA (747)  
 Total Results 5370  
 After de-duplication 4038  
 After title sift 29  
 After abstract sift 8  
 After full text sift 1

1

**“OUTCOMES SEARCH”**  
 Search run on 19-20/03/15  
 Databases searched: Medline (1088), Cinahl (512), PsycInfo (755), ProQuest Social Science Abstracts and Sociological Abstracts and ASSIA (523)  
 Total results 2878  
 After de-duplication 2231  
 After title sift 12  
 After abstract and title sift = 0 retained  
 “by chance” = 4

4

**HAND SEARCH OF British Journal of Healthcare Assistants**

Search run on 24/11/14  
 Volumes searched: 2007-2014  
 Number of editions checked: 77  
 Retained for further inspection: 17  
 Retained: 2

2

**GREY LITERATURE SEARCH**

The following organisations were searched: in January 2014 and repeated in July 2014.

- NHS Evidence
- Veterans Association (VA) (USA)
- NHS England, Wales, Scotland, NI
- Social Care Online
- NIHR
- NHS III
- NICE
- DH
- SCIE
- Open Grey
- International Longevity Centre (ILC)
- Centre for Workforce Intelligence
- DeLoitte Centre
- NMC
- RCN
- Skills for Care
- Skills for Health
- Health Education England
- Joseph Rowntree Foundation
- NHS Education for Scotland
- Point of Care Foundation
- King’s College London
- Care Council for Wales
- Welsh Assembly Government
- Age UK
- Care Forum UK
- Foundations of Nursing Studies
- National Care Forum
- Workforce Education and Development Services, NHS Wales Shared Services Partnership

We also searched the Open Web using the terms “assistant health care workers” and training or interventions, and the terms “staff training” and “older people”

2

**TEACHING**  
 Search run on 05/11/14  
 Databases searched: Web of Science (252), ERIC via ProQuest 1966-current (264)  
 Total results 516  
 After de-duplication 433  
 After title sift 35  
 After abstract and full text sift: 5

5

**POLICE**  
 Search run on 05/11/14  
 Databases searched: Web of Science (8), ProQuest suite of databases (63), Emerald journals (28)  
 Also consulted the Assistant Librarian at the National Police Library  
 Total results 99  
 After de-duplication 433  
 After title sift 35  
 After abstract and full text sift: 3

3

**SEARCHES**  
 59

59

**SNOWBALLING**  
 (Forward citation searching and reference list scanning)  
 3

3

**PAPERS ADDED BY PROJECT GROUP AND STAKEHOLDERS**  
 6

6

76

76
