# Supplementary material for: Improving skills and care standards in the support workforce for older people: a realist synthesis of workforce development interventions
Source: PubMed Central journal article supplement (PMC5013423; doi:10.1136/bmjopen-2016-011964), 2016-08-25

"This work is supported by the National Institute Health Research (NIHR) HS&DR Programme Grant no. 12/129/32. This report presents independent research funded by the National Institute for Health Research (NIHR). The views and opinions expressed by authors in this publication are those of the authors and do not necessarily reflect those of the NHS, the NIHR, NETSCC, the HS&DR programme or the Department of Health"

Older People’s Services and Workforce Interventions: a Synthesis of Evidence

“Relevant and good enough” flow chart

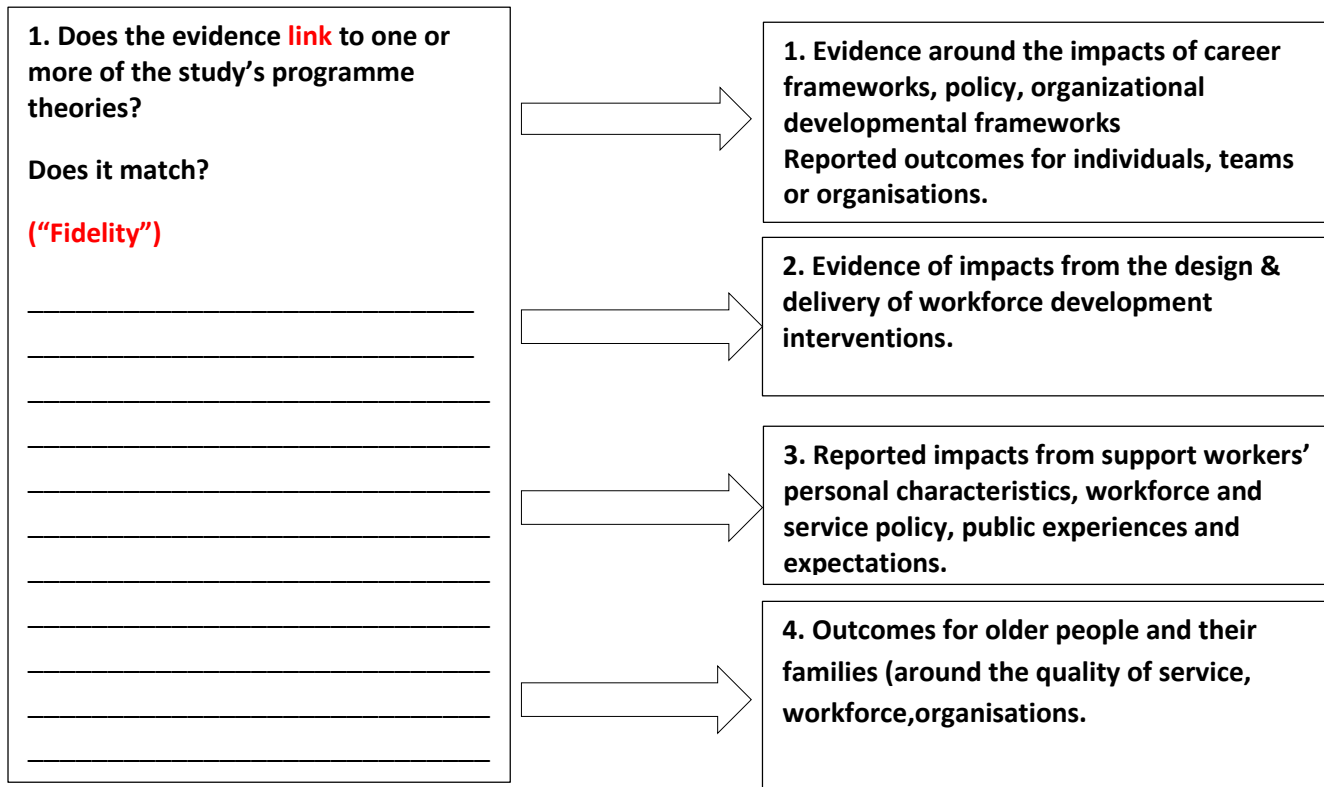

In your judgement:

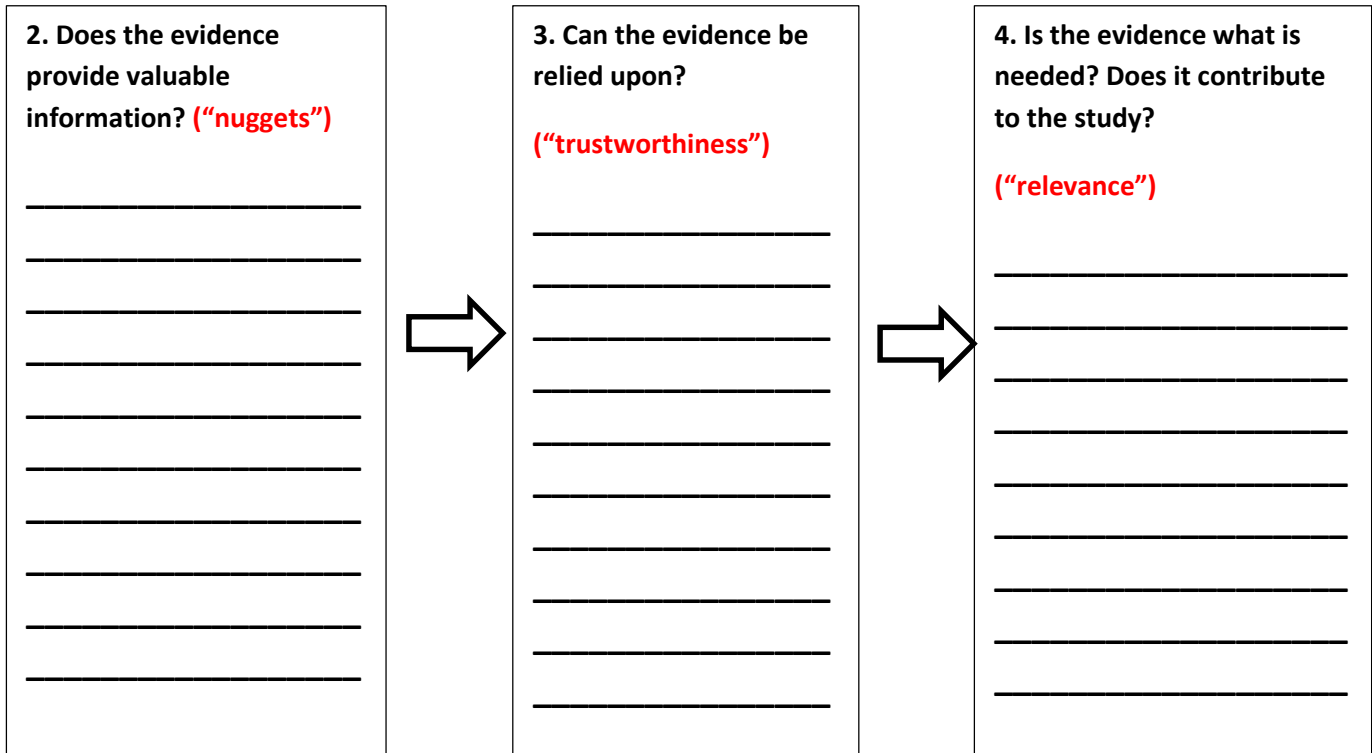

Supplement: bmjopen-2016-011964supp3.pdf [file bmjopen-2016-011964supp3.pdf]
