# Supplementary material for: Improving skills and care standards in the support workforce for older people: a realist synthesis of workforce development interventions
Source: PubMed Central journal article supplement (PMC5013423; doi:10.1136/bmjopen-2016-011964), 2016-08-25
Supplement: bmjopen-2016-011964supp5.pdf [file bmjopen-2016-011964supp5.pdf]

**Hypothesis 1: If workforce development is closely related to practice (cognitive and/or physical), then the intervention is more relevant and more likely to be applied**

Sources: 4, 5, 6, 11, 13, 21,23, 26, 27, 29, 30, 31, 32, 42, 54, 56, 57, 58, 59,63, 65,71

| Study no | Supporting evidence                                                                                                                     | Impacts/ "Effectiveness"                                    | Interpretation                                      |
|----------|-----------------------------------------------------------------------------------------------------------------------------------------|-------------------------------------------------------------|-----------------------------------------------------|
| 4        | "hands-on" patient care<br>Case studies, role-playing                                                                                   |                                                             | Focuses attention on the support worker's own work. |
| 5        | Staff members asked to carry out observations and to participate in fortnightly group supervision sessions. Individual support offered. | Better understanding of behaviour and responses.            | Seeing people differently.                          |
| 6        | Use of residents' biographies.                                                                                                          | Increased resident's perceptions of relationship closeness. |                                                     |
| 26       | Vignettes.                                                                                                                              | Learning more realistic. Empathy.                           |                                                     |
| 42       | Collecting biographical material stories.                                                                                               | Enhanced the delivery of care.                              |                                                     |

|    |                                                                                                                       |                                                                                                                                                        |                                                      |
|----|-----------------------------------------------------------------------------------------------------------------------|--------------------------------------------------------------------------------------------------------------------------------------------------------|------------------------------------------------------|
| 11 | Person centered caregiving skills, experiential role-playing exercise.                                                | Students slightly more person centered than students in the control condition.                                                                         | Playing it out.<br>Copying behaviours.               |
| 13 | Using focused plan to overcome a care-related problem identified within own clinical settings for nursing assistants. | Significant improvement in knowledge for nursing assistants attending the programme.                                                                   | Thinking about new ways to change care.              |
| 19 | Sharing feelings about what's challenging about caring for those with dementia.                                       | Caregivers reported using more gestures, using more humour, asking more questions, and giving the choice between two options more after the workshops. | Being given time to explore own work challenges.     |
| 21 | Training staff within the workplace.                                                                                  | Change in cohesion in staff work, and devoting more attention to residents.                                                                            | Minds already in work mode.                          |
| 23 | In-service skills training.<br>Care planning workshops.                                                               | Interventions more likely to work if short, interactive and on the job.                                                                                | Personal attention for support worker on their work. |
| 27 | Learning groups at the workplace.                                                                                     | More self- esteem.                                                                                                                                     | Confidence building over time.                       |
| 29 | Groups relevant to care assistants' own practice.<br>Storytelling approach with staff sharing experiences.            | Challenged task-orientated focus of care.                                                                                                              | Personal time to explore own practice.               |
| 30 | Practical assessments based on everyday situations.                                                                   | Staff discussing different cases with each other might lead to deeper knowledge and understanding and encourage further learning.                      | Learning from peers.                                 |
| 31 | Case conference style training.                                                                                       | Capturing imagination and helping individuals articulate and challenge their own mental models.                                                        | Thinking differently.                                |

|    |                                                                      |                                                                                                                                                                                                                         |                           |
|----|----------------------------------------------------------------------|-------------------------------------------------------------------------------------------------------------------------------------------------------------------------------------------------------------------------|---------------------------|
| 32 | Role play.<br>Homework based on own practice.                        | Positive feelings about change in progression of getting behaviours right.                                                                                                                                              | Learning what is real.    |
| 54 | Debriefing through film - performance feedback/reflection on action. | Simulation training more real, provision of safer care (knowing what to check).                                                                                                                                         | Sense-making.             |
| 57 | Case studies.                                                        | More frequent appropriate and adequate care.                                                                                                                                                                            |                           |
| 59 | Behavioural approach to care planning.                               | Significant increase in the time staff spent in positive interactions with residents, in terms of direct care and social contact at the end of the training.                                                            |                           |
| 63 | Taught component, competencies, and off the job training.            | Changes to care delivery.<br>Increase sense of satisfaction and achievement.<br>Skill and knowledge development.<br>Changes related to variation in role between clinical areas.<br>Additional competencies identified. | Immersed in own practice. |
| 65 | Training was delivered in the residential homes.                     | Staff reporting in logs that they were more tolerant.<br>Caring made more enjoyable.                                                                                                                                    |                           |
