# Supplementary material for: Improving skills and care standards in the support workforce for older people: a realist synthesis of workforce development interventions
Source: PubMed Central journal article supplement (PMC5013423; doi:10.1136/bmjopen-2016-011964), 2016-08-25
Supplement: bmjopen-2016-011964supp7.pdf [file bmjopen-2016-011964supp7.pdf]

## **Additional file 7: INTERVIEW SPINE**

**As managers/trainers, what do you want to see for the support workforce? What are your current programmes?**

1. We are interested in why some workforce development programmes resonate more with [SUPPORT WORKERS] than others. From your experience, what are the workforce development programmes that best reflect the reality of the daily work that [SUPPORT WORKERS] engage in? What is it that makes them 'real' for participants? work-based?

*Prompt around characteristics: work-related; in the workplace; theory-skill mix; complex versus simple developments; short-term versus programme - seeking examples.*

2. If you wanted to design a workforce development programme that really resonated with [SUPPORT WORKERS], how should this be done? Who should be involved in their design?

*Prompt around people and design processes – seeking examples.*

3. What teaching and learning strategies are most helpful in making workforce development 'real' for participants? What effective strategies have you come across? What else needs to be done?

*Prompt around strategies and techniques (including patient stories; reflection etc., ask for examples from own experiences) – seeking examples.*

4. Are there situations where the delivery of workforce development for [SUPPORT WORKERS] should include other members of the Older Person's services in health and social care?

*Prompt around the relevant issues (e.g. simple versus complex workforce development) and impact (e.g. role appreciation and team-building) – seeking examples.*

5. Are there good examples of where older people themselves (or carers/families/support workers) have been involved in the design and / or delivery of workforce development? Did it work? Why did this work?

6. What are the benefits and disadvantages of delivering workforce development for [SUPPORT WORKERS] in the workplace?

*Prompt around benefits (e.g. real / getting experts in/translates into practice– who delivers) how this is facilitated/ and disadvantages (e.g. noise and space / difficult for time out).*

7. How can we effectively build on the values and experiences that [SUPPORT WORKERS] bring to their work and role?

*Prompt around previous life and work experiences; recruitment issues e.g. values; revisiting and challenging existing ways of working for those longer in the role – seeking examples.*

8. What are the best ways of incentivizing [SUPPORT WORKERS] to engage in workforce development programmes? What's the tipping point? Managers' incentivisation?

*Prompts around certification, accreditation, fit with career development frameworks; and financial incentives from and to the [SUPPORT WORKER] – seek examples and explanations of why incentives worked for different groups / types of [SUPPORT WORKERS].*

9. What is needed at organisational level to make workforce development successful?  
*Prompts around organisational strategy; culture/leadership / senior buy-in; clarity and consistency of expectations across the organization; programmatic approaches versus one-off programmes – seeking examples of good organisational practice.*

10. What would be the most important changes to make to workforce development programmes (yours/and in general) that would increase their impact for [SUPPORT WORKERS]?  
What about for health and social care organisations?
