# Supplementary material for: Improving skills and care standards in the support workforce for older people: a realist synthesis of workforce development interventions
Source: PubMed Central journal article supplement (PMC5013423; doi:10.1136/bmjopen-2016-011964), 2016-08-25
Supplement: bmjopen-2016-011964supp8.pdf [file bmjopen-2016-011964supp8.pdf]

## Additional file 8 – table of included papers

| No | Authors & date                                                                                             | Title                                                                                                                                                                                     | Source                                             |
|----|------------------------------------------------------------------------------------------------------------|-------------------------------------------------------------------------------------------------------------------------------------------------------------------------------------------|----------------------------------------------------|
| 1  | Arblaster, G., Streather, C., Hugill, L., McKenzie, M. & Missenden, J. (2004)                              | A training programme for healthcare support workers                                                                                                                                       | <i>Nursing Standard</i>                            |
| 2  | Aubry, F., Etheridge, F. & Couturier, Y. (2012)                                                            | Facilitating change among nursing assistants in long term care                                                                                                                            | <i>Online Journal of Issues in Nursing</i>         |
| 3  | Braun, K. L., Cheang, M. & Shigeta, D. (2005)                                                              | Increasing knowledge, skills, and empathy among direct care workers in elder care: a preliminary study of an active-learning model                                                        | <i>The Gerontologist</i>                           |
| 4  | Cherry, B., Marshall-Grey, P., Laurence, A., Green, A., Valadez, A., Scott-Tilley, D. & Merritt, P. (2007) | Innovative education for certified nurse aides and charge nurses                                                                                                                          | <i>Journal of Gerontological Nursing</i>           |
| 5  | Clare, L., Whitaker, R., Woods, R. T., Quinn, C., Jelley, H., Hoare, Z. et al. (2013)                      | AwareCare: a pilot randomized controlled trial of an awareness-based staff training intervention to improve quality of life for residents with severe dementia in long-term care settings | <i>International Psychogeriatrics</i>              |
| 6  | Coleman, C. & Medvene, L. (2013)                                                                           | A person-centred care intervention for geriatric certified nursing assistants                                                                                                             | <i>The Gerontologist</i>                           |
| 7  | Coogle, C., Parham, I., Jablonski, R. & Rachel, J. (2007)                                                  | The value of geriatric care enhancement training for direct service workers                                                                                                               | <i>Gerontology and Geriatrics Education</i>        |
| 8  | Cowan, D., Roberts, J., Fitzpatrick, J., While, A. & Baldwin, J. (2004)                                    | The approaches to learning of support workers employed in the care home sector: an evaluation study                                                                                       | <i>Nurse Education Today</i>                       |
| 9  | Ersek, M. & Wood, B. (2008)                                                                                | Development and evaluation of a nursing assistant computerised education programme                                                                                                        | <i>International Journal of Palliative Nursing</i> |
| 10 | Goodridge, D., Johnston, P. & Thomson, M. (1997)                                                           | Impact of a nursing training program on job performance, attitudes, and relationships with residents                                                                                      | <i>Educational Gerontology</i>                     |

|    |                                                                              |                                                                                                                                        |                                                              |
|----|------------------------------------------------------------------------------|----------------------------------------------------------------------------------------------------------------------------------------|--------------------------------------------------------------|
| 11 | Grosch, K., Medvene, L. & Wolcott, H. (2008)                                 | Person-centred care-giving instruction for geriatric nursing assistant students                                                        | <i>Journal of Gerontological Nursing</i>                     |
| 12 | Hegeman, C. (2003)                                                           | Peer mentoring of nursing home CNAs: a way to create a culture of caring                                                               | <i>Journal of Social Work in Long -term care</i>             |
| 13 | Lerner, N., , Resnick, B., Galik, E. & Gunther Russ, K. (2010)               | Advanced nursing assistant education program                                                                                           | <i>The Journal of Continuing Education in Nursing</i>        |
| 14 | Morgan, J. & Conrad, T. (2008)                                               | A mixed-method evaluation of a workforce development intervention for nursing assistants in nursing homes: the case of WIN A STEP UP   | <i>The Gerontologist</i>                                     |
| 15 | Nelson, S. & Wild, D. (2009)                                                 | The forgotten sector: workforce development in residential care for older people                                                       | <i>Nursing and Residential Care</i>                          |
| 16 | Noelker, L., Ejaz, F., Menne, H. & Jones, J. (2006)                          | The Impact of stress and support on nursing assistant satisfaction with supervision                                                    | <i>Journal of Applied Gerontology</i>                        |
| 17 | Noelker, L.,Ejaz, F., Menne, H. & Bagaka, J. (2009)                          | Factors affecting frontline workers' satisfaction with supervision                                                                     | <i>Journal of Aging and Health</i>                           |
| 18 | Parks, S. M., Haines, C., Foreman, D., McKinstry, E. & Maxwell, T. L. (2005) | Evaluation of an educational program for long term care nursing assistants                                                             | <i>Journal of the American Medical Directors Association</i> |
| 19 | Passalacqua, S. & Harwood, J. (2012)                                         | VIPS communication skills training for paraprofessional dementia caregivers: an intervention to increase person-centered dementia care | <i>Clinical Gerontologist</i>                                |
| 20 | Petterson, I-L., Donnersvard, H., Lagerstrom, M. & Toomingas, A. (2006)      | Evaluation of an intervention programme based on empowerment for eldercare nursing staff                                               | <i>Work and Stress</i>                                       |
| 21 | Ron, P. & Lowenstein, A. (2002)                                              | In service training of professional and para-professional staff in institutions for the aged                                           | <i>Educational Gerontology</i>                               |
| 22 | Ruckdeschel, K. & Van Haitsma, K. (2004)                                     | A workshop for nursing home staff                                                                                                      | <i>Gerontology and Geriatrics Education</i>                  |
| 23 | Stevens, A. B., Hochhalter, A. K., Hyer, L. & Intrieri, R. C. (2006)         | Meeting the needs of nursing home residents and staff                                                                                  | <i>Geropsychological Interventions in Long-Term Care</i>     |

|    |                                                                                                   |                                                                                                                                                     |                                                        |
|----|---------------------------------------------------------------------------------------------------|-----------------------------------------------------------------------------------------------------------------------------------------------------|--------------------------------------------------------|
| 24 | Stevens-Roseman, E. & Leung, P. (2004)                                                            | Enhancing attitudes, knowledge, and skills of paraprofessional service providers in elder care settings                                             | <i>Gerontology and Geriatrics Education</i>            |
| 25 | Thomson, M. & Burke, K. (1998)                                                                    | A nursing assistant training program in a long term care setting                                                                                    | <i>Gerontology and Geriatrics Education</i>            |
| 26 | Tisher, T., Dean, S. & Tisher, M. (2009)                                                          | Aged care residential facility and family interface: a training program for staff                                                                   | <i>Clinical Gerontologist</i>                          |
| 27 | Wadenstein, B., Engstrom, M. & Haggstrom, E. (2009)                                               | Public nursing home staffs experience of participating in an intervention aimed at enhancing their self-esteem                                      | <i>Journal of Nursing Management</i>                   |
| 28 | White, D. & Cadiz, D. (2013)                                                                      | Efficacy of work-based training for direct care workers in assisted living                                                                          | <i>Journal of Aging and Social Policy</i>              |
| 29 | Hockley, J. (2014)                                                                                | Learning, support and communication for staff in care homes: outcomes of reflective debriefing groups in two care homes to enhance end-of-life care | <i>International Journal of Older people's Nursing</i> |
| 30 | Nilsson, A., Andren, M. & Engstrom, M. (2014)                                                     | E-assessment of prior learning: a pilot study of interactive assessment of staff with no formal education who are working in Swedish elderly care   | <i>BMC Geriatrics</i>                                  |
| 31 | Anderson, R., Ammarell, N., Bailey, D., Colón-Emeric, C., Corazzini, K., Lillie, M. et al. (2005) | Nurse assistant mental models, sense-making, care actions, and consequences for nursing home residents                                              | <i>Qualitative Health Research</i>                     |
| 32 | Boettcher, I., Kemeny, B., DeShon, R., Stevens, A. (2004)                                         | A system to develop staff behaviours for person-centered care                                                                                       | <i>Alzheimer's Care Quarterly</i>                      |
| 33 | McGilton, K., O'Brien-Pallas, L., Darlington, G., Evans, M., Wynn, F. & Pringle, D. (2003)        | Effects of a relationship-enhancing program of care on outcomes                                                                                     | <i>Clinical Scholarship</i>                            |
| 34 | McCormack, B., Dewing, L., Breslin, L., Coyne-Nevin, A., Kennedy, K., Manning, M. et al. (2010)   | Developing person-centred practice: nursing outcomes arising from changes to the care environment in residential settings for older people          | <i>International Journal of Older People's Nursing</i> |

|    |                                                                                             |                                                                                                                                                                    |                                                      |
|----|---------------------------------------------------------------------------------------------|--------------------------------------------------------------------------------------------------------------------------------------------------------------------|------------------------------------------------------|
| 35 | McCormack, B. & Wright, J. (1999)                                                           | Achieving dignified care for older people through practice development: a systematic approach                                                                      | <i>Nursing Times Research</i>                        |
| 36 | Yalden, J., McCormack, B., O'Connor, M. & Hardy, S. (1999)                                  | Transforming end of life care using practice development : an arts-informed approach in residential aged care                                                      | <i>International Practice Development Journal</i>    |
| 37 | Webster, J., Coats, E. & Noble, G. (2009)                                                   | Enabling dignity in care through practice development with older people                                                                                            | <i>Practice Development in Health Care</i>           |
| 38 | Howatson-Jones, L., Thurgate, C., Graber, M., Harnett, C., Thompson, J. & Jordan, D. (2012) | Biographical learning: a process for promoting person-centeredness in nursing                                                                                      | <i>International Practice Development Journal</i>    |
| 39 | Manley, K., Sanders, K., Cardiff, S. & Webster, J. (2011)                                   | Effective workplace culture: the attributes, enabling factors and consequences of a new concept                                                                    | <i>International Practice Development Journal</i>    |
| 40 | Health Service Executive. (2010)                                                            | The implementation of a model of person-centred practice in older persons setting                                                                                  | <i>Health Service Executive</i>                      |
| 41 | McCormack, B. (2003)                                                                        | A conceptual framework for person-centred practice with older people                                                                                               | <i>International Journal of Nursing Practice</i>     |
| 42 | Clarke, A. C., Hanson, E. J. & Ross, H. (2003)                                              | Seeing the person behind the patient: enhancing the care of older people using a biographical approach                                                             | <i>Journal of Clinical Nursing</i>                   |
| 43 | Medvene, L. & Lann-Wolcott, H. (2009)                                                       | An exploratory study of nurse aides' communication behaviours: giving "positive regard" as a strategy                                                              | <i>International Journal of Older people Nursing</i> |
| 44 | Brown, J., Nolan, M., Davies, S., Nolan, J. & Keady, J. (2007)                              | Transforming students' views of gerontological nursing: Realising the potential of "enriched" environments of learning and care: a multi-method longitudinal study | <i>International Journal of Nursing Studies</i>      |
| 45 | McLellan, H., Bateman, H. & Bailey, P. (2005)                                               | The place of 360 degree appraisal within a team approach to professional development                                                                               | <i>Journal of Interprofessional care</i>             |
| 46 | Parry, R. & Vass, C. (1997)                                                                 | Training and assessment of physiotherapy assistants                                                                                                                | <i>Physiotherapy</i>                                 |

|    |                                                                                                                |                                                                                                                                                                 |                                                          |
|----|----------------------------------------------------------------------------------------------------------------|-----------------------------------------------------------------------------------------------------------------------------------------------------------------|----------------------------------------------------------|
| 47 | Graber, D. R., Mitcham, M. D., Coker-Bolt, P., Wise, H. H., Jacques, P., Edlund, B. & Annan-Coultas, D. (2012) | The caring professionals program: educational approaches that integrate caring attitudes and empathic behaviours into health professions education              | <i>Journal of Allied Health</i>                          |
| 48 | Vail, L., Bosley, S., Petrova, M. & Dale, J (2011)                                                             | Healthcare assistants in general practice: a qualitative study of their experiences                                                                             | <i>Primary Health Care Research</i>                      |
| 49 | Bailey, S., Scales, K., Lloyd, J., Schneider, J. & Jones, R. (2013)                                            | The emotional labour of healthcare assistants in inpatient dementia care                                                                                        | <i>Ageing and Society</i>                                |
| 50 | Noelker, L. S. & Ejaz, F. K. (2005)                                                                            | Training direct-care workers for person-centered care                                                                                                           | <i>Public Policy &amp; Aging Report</i>                  |
| 51 | Welsh, J. D. & Szabo, G. B. (2011)                                                                             | Teaching nursing assistant students about aphasia and communication                                                                                             | <i>Seminars in Speech and Language</i>                   |
| 52 | Ryan, T., Nolan, M., Enderby, P. & Reid, D. (2004)                                                             | Part of the family: sources of job satisfaction amongst a group of community –based dementia care workers                                                       | <i>Health and Social Care in the Community</i>           |
| 53 | Gethin-Jones, S. (2013)                                                                                        | Focus on the micro-relationship of care                                                                                                                         | <i>British Journal of Healthcare Assistants</i>          |
| 54 | McKenzie-Smith, M. (2013)                                                                                      | Simulation-based education in support of HCA development                                                                                                        | <i>British Journal of Healthcare Assistants</i>          |
| 55 | Godfrey, A. (2000)                                                                                             | What impact does training have on the care received by older people in residential homes?                                                                       | <i>Social Work Education</i>                             |
| 56 | McCallion, P., Toseland, R. W., Lacey, D. & Banks, S. (1999)                                                   | Educating nursing assistants to communicate more effectively with nursing home residents with dementia                                                          | <i>The Gerontologist</i>                                 |
| 57 | Smith, B., Kerse, N. & Parsons, M. (2005)                                                                      | Quality of residential care for older people: does education for healthcare assistants make a difference?                                                       | <i>The New Zealand Medical Journal</i>                   |
| 58 | Lewis, R., Kelly, S., Whitfield, M., Mckenzie-Smith, M. & Strachan, A. (2013)                                  | An evaluation of a simulation-based educational programme to equip HCAs with the necessary non-technical skills to undertake their role safely and effectively, | <i>Yorkshire &amp; Humber Strategic Health Authority</i> |

|                    |                                                                                                        |                                                                                                                                          |                                                   |
|--------------------|--------------------------------------------------------------------------------------------------------|------------------------------------------------------------------------------------------------------------------------------------------|---------------------------------------------------|
|                    |                                                                                                        | specifically in relation to the measurement of vital signs                                                                               |                                                   |
| 59                 | Proctor, R., Stratton Powell, H., Burns, A., TARRIER, N., Reeves, D., Emerson, E. & Hatton, C. (1998)  | An observational study to evaluate the impact of a specialist outreach team on the quality of care in nursing and residential homes      | <i>Aging &amp; Mental Health</i>                  |
| 60                 | Burgio, L. D., Allen-Burge, R., Roth D. L., Bourgeois, M. S., Dijkstra, K., Gerstle, J. et al (2001)   | Come talk with me: improving communication between nursing assistants and nursing home residents during care routines                    | <i>The Gerontologist</i>                          |
| 61                 | Bourgeois, M., Dijkstra, K., Burgio, L. & Allen, R. (2004)                                             | Communication skills training for nursing aides of residents with dementia                                                               | <i>Clinical Gerontologist</i>                     |
| 62                 | Latta, L & Ross, J (2010)                                                                              | Exploring the impact of palliative care education for care assistants employed in residential aged care facilities in Otago, New Zealand | <i>SITES</i>                                      |
| 63                 | Hancock, H., Campbell, S., Ramprogus, V. & Kilgour, J (2005)                                           | Role development in healthcare assistants: the impact of education on practice                                                           | <i>Journal of Evaluation in Clinical Practice</i> |
| 64                 | Chapman, A. & Law, S. (2009)                                                                           | Bridging the gap: an innovative dementia learning program for healthcare assistants in hospital wards using facilitator-led discussions  | <i>International Psychogeriatrics</i>             |
| 65                 | Moxon, S., Lyne, K., Sinclair, I., Young, P. & Kirk, C. (2001)                                         | Mental health in residential homes: a role for care staff                                                                                | <i>Ageing and Society</i>                         |
| 66                 | Kuske, B., Luck, T., Hanns, S., Matschinger, H., Angermyer, M., Behrens, J. & Riedel-Heller, S. (2009) | Training in dementia care: a cluster-randomised controlled trial of a training program for nursing home staff in Germany                 | <i>International Psychogeriatrics</i>             |
| 67                 | Bryan, K., Axelrod, L., Maxim, J., Bell, L. & Jordan. L. (2002)                                        | Working with older people with communication difficulties: an evaluation of care worker training                                         | <i>Aging and Mental Health</i>                    |
| 68 * from policing | Sutherland, J. (2014)                                                                                  | The PCSO review- an evaluation of the role, value and establishment of police                                                            | <i>Cambridgeshire Constabulary</i>                |

|                     |                                                                       |                                                                                                                 |                                                                              |
|---------------------|-----------------------------------------------------------------------|-----------------------------------------------------------------------------------------------------------------|------------------------------------------------------------------------------|
|                     |                                                                       | community support officers within Cambridgeshire constabulary                                                   |                                                                              |
| 69* from policing   | O'Neill, M. (2014)                                                    | PCSOS as the paraprofessionals of policing                                                                      | <i>Leverhulme Trust</i>                                                      |
| 70* from policing   | Cooper, C., Anscombe, J., Avenell, J., McLean, F. & Morris, J. (2006) | A national evaluation of community support officers                                                             | <i>Home Office Research Study 297</i>                                        |
| 71* from education  | Farrell, P., Balshaw, M. & Polat, F. (1999)                           | The management, role and training of learning support assistants                                                | <i>Department for Education and Employment</i>                               |
| 72* from education  | Jolly, A. & Evans, S. (2005)                                          | Teacher assistants move to the front of the class: job-embedded learning pays off in student achievement        | <i>The Journal of Staff Development</i>                                      |
| 73* from education  | Groom, B. (2006)                                                      | Building relationships for learning: the developing role of the teaching assistant                              | <i>Support for Learning</i>                                                  |
| 74* from education  | Collins, J. & Simco, N. (2006)                                        | Teaching assistants reflect: the way forward?                                                                   | <i>Reflective Practice: International and Multidisciplinary Perspectives</i> |
| 75 * from education | Righter, B. (1987)                                                    | Training for teaching assistants                                                                                | <i>Engineering Education</i>                                                 |
| 76                  | Santo Pietro, M. (2002)                                               | Training nursing assistants to communicate effectively with persons with Alzheimer's Disease: a call for action | <i>Alzheimer's Care Quarterly</i>                                            |
